# Supplementary material for: Repletion of TNFα or leptin in calorically restricted mice suppresses post-restriction hyperphagia
Source: PubMed Central journal article supplement — Dis Model Mech. 2011 Sep 27;5(1):83–94. doi: 10.1242/dmm.007781 (PMC3255546; doi:10.1242/dmm.007781), 2011-09-27
Supplement: supp_007781_DMM007781FigS1.pdf [file supp_007781_DMM007781FigS1.pdf]

## Supplemental Data

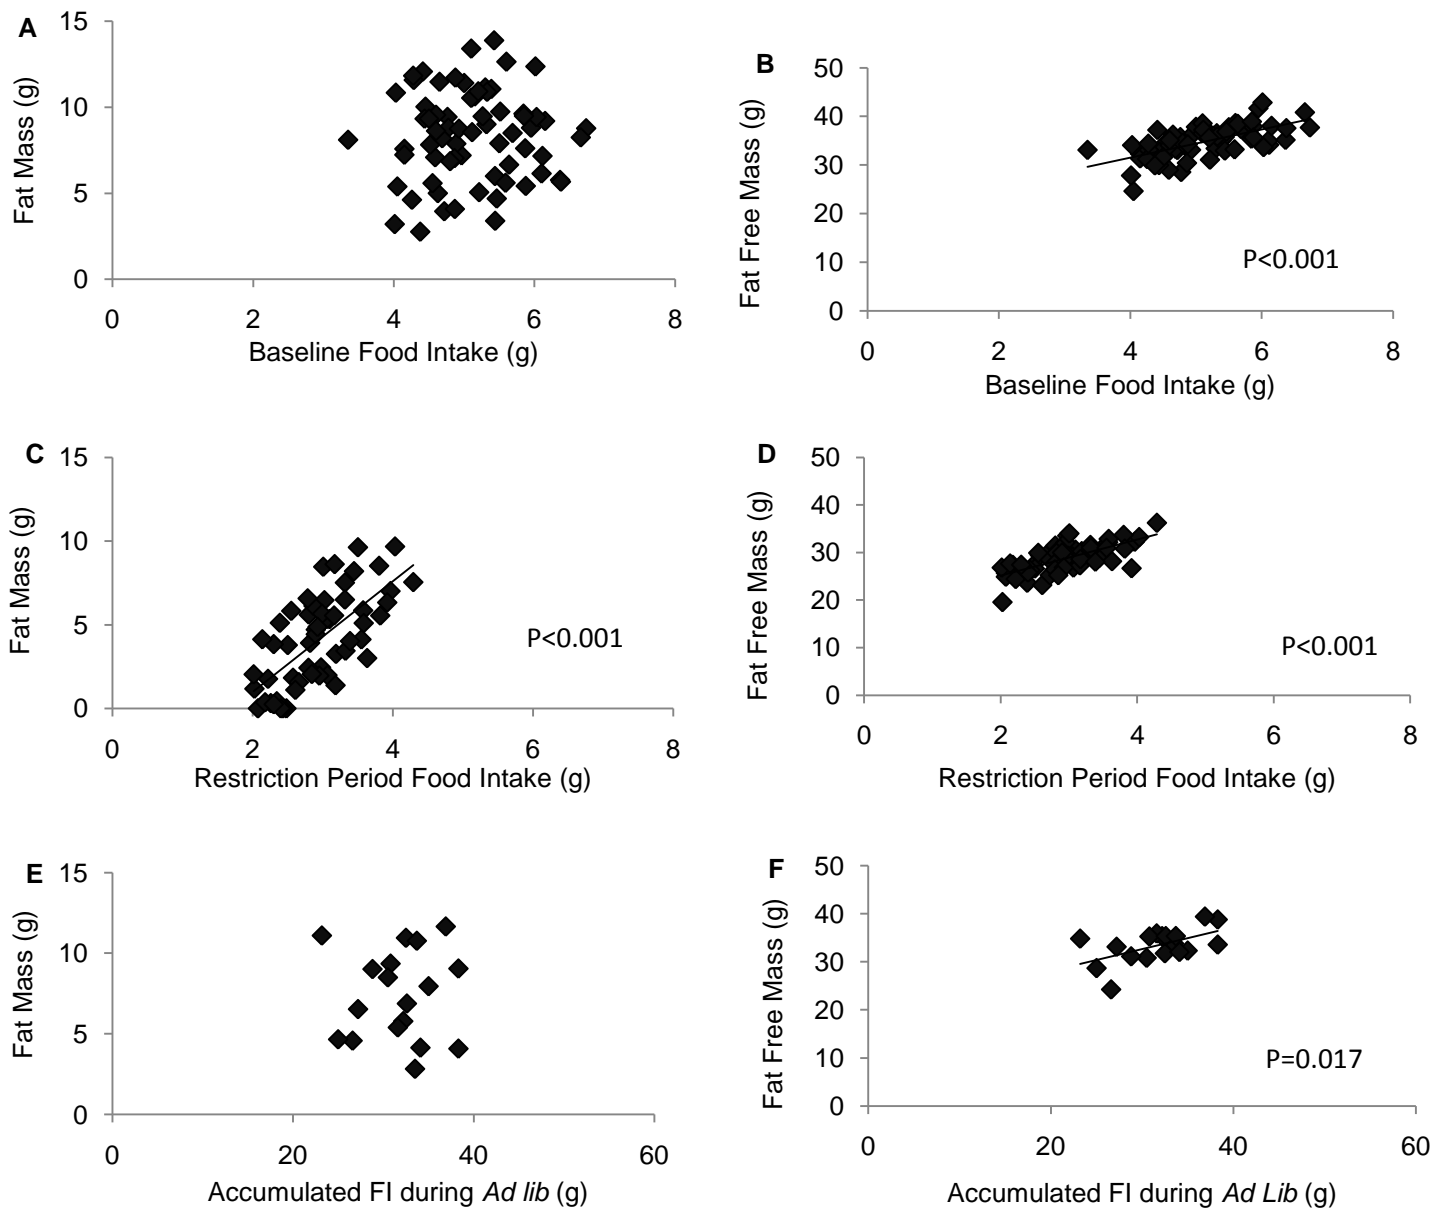

**Figure S1.** Relationship between fat or fat free mass and food intake for the 3 different stages of experiment. (A and B) baseline with all animals included. (C and D) during restriction. (E and F) during *ad lib* recovery for animals that had been on restriction only.
