# Supplementary material for: Repletion of TNFα or leptin in calorically restricted mice suppresses post-restriction hyperphagia
Source: PubMed Central journal article supplement — Dis Model Mech. 2011 Sep 27;5(1):83–94. doi: 10.1242/dmm.007781 (PMC3255546; doi:10.1242/dmm.007781), 2011-09-27
Supplement: supp_007781_DMM007781TableS1.pdf [file supp_007781_DMM007781TableS1.pdf]

**Table S1**

This table is related to Figs 1 and 2. Basic parameters measured during short (25 days) or long (75 days) term restriction. Data are means  $\pm$  SE. Restriction data is the mean over the last 5 days of restriction for food intake (FI) and body mass (BM). Fat mass (FM) and fat free mass (FFM) are also shown. Data for control animals that fed *ad libitum* are presented for the same measurement periods as the two restricted groups.

|                    | Control         | 25-Day Restriction | 75-Day Restriction |
|--------------------|-----------------|--------------------|--------------------|
| <b>Baseline</b>    |                 |                    |                    |
| FI (g)             | 6.0 $\pm$ 0.12  | 6.0 $\pm$ 0.10     | 6.0 $\pm$ 0.14     |
| BM (g)             | 46.6 $\pm$ 1.08 | 46.4 $\pm$ 0.75    | 46.7 $\pm$ 0.90    |
| FM (g)             | 7.6 $\pm$ 0.56  | 7.7 $\pm$ 0.49     | 7.2 $\pm$ 0.46     |
| FFM (g)            | 37.0 $\pm$ 0.64 | 36.4 $\pm$ 0.45    | 37.6 $\pm$ 0.54    |
| <b>Restriction</b> |                 |                    |                    |
| FI (g)             | 5.6 $\pm$ 0.13  | 3.7 $\pm$ 0.08     | 3.8 $\pm$ 0.09     |
| BM (g)             | 49.9 $\pm$ 1.36 | 37.2 $\pm$ 0.61    | 37.1 $\pm$ 0.81    |
| FM (g)             | 10.2 $\pm$ 0.68 | 4.2 $\pm$ 0.44     | 4.0 $\pm$ 0.45     |
| FFM (g)            | 37.7 $\pm$ 0.88 | 35.6 $\pm$ 0.38    | 34.9 $\pm$ 0.61    |
| <b>Ad lib</b>      |                 |                    |                    |
| FI (g)             | 4.9 $\pm$ 0.16  | 7.0 $\pm$ 0.20     | 7.3 $\pm$ 0.27     |
| BM (g)             | 49.5 $\pm$ 1.34 | 44.2 $\pm$ 0.59    | 44.3 $\pm$ 0.71    |
| FM (g)             | 10.4 $\pm$ 0.72 | 7.5 $\pm$ 0.36     | 7.1 $\pm$ 0.40     |
| FFM (g)            | 37.2 $\pm$ 0.87 | 35.6 $\pm$ 0.37    | 36.5 $\pm$ 0.55    |
