# Supplementary material for: Repletion of TNFα or leptin in calorically restricted mice suppresses post-restriction hyperphagia
Source: PubMed Central journal article supplement — Dis Model Mech. 2011 Sep 27;5(1):83–94. doi: 10.1242/dmm.007781 (PMC3255546; doi:10.1242/dmm.007781), 2011-09-27
Supplement: supp_007781_DMM007781TableS2.pdf [file supp_007781_DMM007781TableS2.pdf]

**Table S2**

This table is related to Fig. 3. Basic parameters measured during low (to 65% of *ad lib*) or high (to 50% of *ad lib*) restriction. AL = *ad libitum*. Data are means  $\pm$  SE. Restriction data is the mean over the last 5 days of restriction for food intake (FI) and body mass (BM). Fat mass (FM) and fat free mass (FFM) are also shown. Data for control animals that fed *ad libitum* are presented for the same measurement periods as the two restricted groups.

|                    | <b>Control</b>  | <b>65% of AL</b> | <b>50% of AL</b> |
|--------------------|-----------------|------------------|------------------|
| <b>Baseline</b>    |                 |                  |                  |
| FI (g)             | 5.2 $\pm$ 0.20  | 5.1 $\pm$ 0.14   | 5.1 $\pm$ 0.14   |
| BM (g)             | 47.2 $\pm$ 1.49 | 44.9 $\pm$ 1.74  | 43.6 $\pm$ 0.97  |
| FM (g)             | 8.6 $\pm$ 0.88  | 8.3 $\pm$ 0.54   | 8.3 $\pm$ 0.44   |
| FFM (g)            | 34.6 $\pm$ 0.78 | 34.9 $\pm$ 0.71  | 34.8 $\pm$ 0.71  |
| <b>Restriction</b> |                 |                  |                  |
| FI (g)             | 4.9 $\pm$ 0.20  | 3.3 $\pm$ 0.09   | 2.6 $\pm$ 0.07   |
| BM (g)             | 46.9 $\pm$ 1.37 | 39.3 $\pm$ 0.91  | 34.4 $\pm$ 0.94  |
| FM (g)             | 10.0 $\pm$ 0.82 | 6.1 $\pm$ 0.75   | 2.3 $\pm$ 1.02   |
| FFM (g)            | 32.6 $\pm$ 0.73 | 29.7 $\pm$ 0.89  | 28.2 $\pm$ 1.39  |
| <b>Ad lib</b>      |                 |                  |                  |
| FI (g)             |                 | 7.7 $\pm$ 0.38   | 8.3 $\pm$ 0.28   |
| BM (g)             |                 | 45.7 $\pm$ 0.85  | 42.8 $\pm$ 1.24  |
| FM (g)             |                 | 8.9 $\pm$ 0.71   | 5.9 $\pm$ 0.88   |
| FFM (g)            |                 | 33.3 $\pm$ 1.02  | 33.5 $\pm$ 1.37  |
