# Supplementary material for: Repletion of TNFα or leptin in calorically restricted mice suppresses post-restriction hyperphagia
Source: PubMed Central journal article supplement — Dis Model Mech. 2011 Sep 27;5(1):83–94. doi: 10.1242/dmm.007781 (PMC3255546; doi:10.1242/dmm.007781), 2011-09-27
Supplement: supp_007781_DMM007781TableS3.pdf [file supp_007781_DMM007781TableS3.pdf]

**Table S3**

This table is related to Fig. 4. Basic parameters measured for animals implanted with either PBS, Leptin or TNF- $\alpha$  in comparison with controls.

Data are means  $\pm$  SE. Restriction data is the mean over the last 5 days of restriction for food intake (FI) and body mass (BM). Fat mass (FM) and fat free mass (FFM) are also shown.

Abbreviations: Phosphate buffered saline (PBS), tumor necrosis factor alpha (TNF- $\alpha$ )

|                    | <b>Control</b>  | <b>PBS implant</b> | <b>Leptin implant</b> | <b>TNF-<math>\alpha</math> implant</b> |
|--------------------|-----------------|--------------------|-----------------------|----------------------------------------|
| <b>Baseline</b>    |                 |                    |                       |                                        |
| FI (g)             | 5.6 $\pm$ 0.19  | 5.6 $\pm$ 0.26     | 5.9 $\pm$ 0.22        | 5.6 $\pm$ 0.18                         |
| BM (g)             | 44.4 $\pm$ 1.92 | 45.8 $\pm$ 1.22    | 44.5 $\pm$ 1.92       | 44.8 $\pm$ 1.25                        |
| FM (g)             | 7.5 $\pm$ 0.83  | 7.7 $\pm$ 1.04     | 7.4 $\pm$ 0.87        | 8.3 $\pm$ 0.68                         |
| FFM (g)            | 37.7 $\pm$ 0.99 | 38.3 $\pm$ 0.42    | 37.6 $\pm$ 0.76       | 37.0 $\pm$ 0.81                        |
| <b>Restriction</b> |                 |                    |                       |                                        |
| FI (g)             | 5.2 $\pm$ 0.29  | 3.3 $\pm$ 0.14     | 3.5 $\pm$ 0.14        | 3.3 $\pm$ 0.12                         |
| BM (g)             | 46.3 $\pm$ 1.93 | 38.7 $\pm$ 1.45    | 39.0 $\pm$ 1.38       | 38.8 $\pm$ 1.47                        |
| FM (g)             | 8.9 $\pm$ 0.86  | 5.6 $\pm$ 0.86     | 6.0 $\pm$ 0.74        | 6.5 $\pm$ 0.94                         |
| FFM (g)            | 37.5 $\pm$ 0.98 | 33.4 $\pm$ 0.68    | 32.7 $\pm$ 0.90       | 32.4 $\pm$ 0.96                        |
| <b>Ad lib</b>      |                 |                    |                       |                                        |
| FI (g)             | 5.2 $\pm$ 0.21  | 6.5 $\pm$ 0.29     | 5.9 $\pm$ 0.18        | 5.8 $\pm$ 0.18                         |
| BM (g)             | 46.6 $\pm$ 1.76 | 44.1 $\pm$ 0.74    | 43.2 $\pm$ 1.27       | 42.6 $\pm$ 1.23                        |
| FM (g)             | 9.3 $\pm$ 0.79  | 8.4 $\pm$ 0.51     | 8.2 $\pm$ 0.80        | 8.5 $\pm$ 0.59                         |
| FFM (g)            | 38.0 $\pm$ 0.93 | 38.4 $\pm$ 0.53    | 37.4 $\pm$ 0.77       | 36.3 $\pm$ 0.68                        |
